# Supplementary material
Source: PubMed Central journal article supplement (PMC6746403)
Supplement: NIHMS1049193-supplement-Supp_Tables_S1___S2.pdf [file NIHMS1049193-supplement-Supp_Tables_S1___S2.pdf]

### Supplementary Table S1 Adverse Events N=50

| AE (%)        | G2/3/4 | Grade 2 | Grade 3 | Grade 4 |
|---------------|--------|---------|---------|---------|
| Neutropenia   | 48%    | 22%     | 22%     | 4%      |
| Leukopenia    | 22%    | 22%     | 0       | 0       |
| Fatigue       | 14%    | 14%     | 0       | 0       |
| ALT elevation | 6%     | 2%      | 4%      | 0       |
| AST elevation | 2%     | 0       | 2%      | 0       |
| Hypertension  | 4%     | 2%      | 2%      | 0       |
| Cholecystitis | 2%     | 0       | 2%      | 0       |

AEs with >10% incidence or if Grade 3 and above are included

**Supplementary Table S2 Clinical and Radiologic response for patients received at least 3 cycles of therapy (n=41)**

|                                                                                                    | Clinical (n=41)*<br>N (%) | Ultrasound (n=27)*<br>N (%) | Mammogram (n=29)*<br>N (%) |
|----------------------------------------------------------------------------------------------------|---------------------------|-----------------------------|----------------------------|
| CR (Complete response)                                                                             | 11                        | 1                           | 3                          |
| PR (Partial response)                                                                              | 22                        | 10                          | 12                         |
| SD (Stable disease)                                                                                | 6                         | 16                          | 14                         |
| PD (Progressive disease)                                                                           | 2#                        | 0                           | 0                          |
| Response rate (%CR+ %PR)                                                                           | 80% (68-90%)              | 41% ( 25-58%)               | 52% (35-68%)               |
| * number of patients with tumor measured at baseline and end of therapy; #not confirmed by imaging |                           |                             |                            |
