# Supplementary material
Source: PubMed Central journal article supplement (PMC6746403)
Supplement: NIHMS1049193-supplement-Supp_Tables_S3___S4_Captions.pdf [file NIHMS1049193-supplement-Supp_Tables_S3___S4_Captions.pdf]

**Supplementary Table S3. 83-gene panel sequencing data. (Attached)**

**Supplementary Table S4. Limma and GOSTats analysis for differentially expressed genes and enriched biological pathways induced by treatment. (Attached)**

The 1<sup>st</sup> spreadsheet provides the analysis of individual genes including the test statistics, the raw P-value and the FDR adjusted P-value (qvalue) on an overall F-test testing for any significance among the three comparisons (C1D1 vs. C0D1, C1D15 vs. C1D1, Surgery vs. C1D15) and the t tests for each comparison between two time points. Yellow highlighted are selected ER regulated genes that were significantly reduced at C1D1 compared to C0D1. The 2<sup>nd</sup> spreadsheet gives the gene ontology (GO) analysis result on enriched GO terms for genes significantly differentially expressed (DE) between C1D1 versus C0D1 (i.e., anastrozole effect genes). The 3<sup>rd</sup> spreadsheet gives the gene ontology (GO) analysis result on enriched GO terms for genes significantly differentially expressed (DE) between Surgery vs. C1D15 (i.e., palbociclib effect genes).
